# Supplementary material for: Effect of Zn and Zr addition on the synthesis of an AlH3/MgCl2 nanocomposite and its de-hydriding properties
Source: Royal Society of Chemistry journal article supplement (doi:10.1039/c4ra16635c), 2015-01-01
Supplement: c4ra16635c1.pdf [file c4ra16635c1.pdf]

## Supporting information

### **Effect of Zn and Zr addition on synthesis of AlH<sub>3</sub>/MgCl<sub>2</sub> nanocomposite and its de-hydrating properties**

Duan Congwen, Hu Lianxi\* and Sun Yu

School of Materials Science and Engineering, Harbin Institute of Technology, Harbin, 150001, China

E-mail: 12B909049@hit.edu.cn

#### **Synthesis of AlH<sub>3</sub>**

Basic reaction in the process

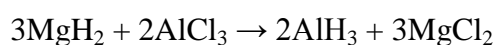

The AlH<sub>3</sub> was synthesized by solid state reaction milling with cheaper nanocrystalline MgH<sub>2</sub> and AlCl<sub>3</sub> as starting materials. Comparing to the conventional method, it is an economically practical route for synthesizing AlH<sub>3</sub>.

Reagents and procedure

The nanocrystalline MgH<sub>2</sub> which was prepared by milling Mg-5.5%Zn-0.6%Zr (mass.%) alloy or Mg (Sigma Aldrich, 99%) powder in hydrogen atmosphere for 15 and 20 h, and AlCl<sub>3</sub> (Sigma Aldrich, 99%) powders (3:2) were used as starting reagents without further purification. The mixed powder was reactively ball milled at a ball-to-powder ratio of 60:1 for 25 h. Simultaneously, Ball milling (using equal numbers of 10 and 6 mm stainless steel balls) was performed using stainless steel ball milling canister (500 cm<sup>3</sup> internal volume) attached to a Glen Mills Turbula T2C shaker mixer operating in a planetary ball milling machine (QM-3SP4, Nanjing, China) with 400 rpm at room temperature.

The dehydrating of as-milled samples were measured by using a special home-made vacuum apparatus. The mass of the powder for each dehydrating treatment was about

10 g. Initially, the evacuated volume inside the apparatus can reach a vacuum of  $1 \times 10^{-2}$  Pa. To investigate the effect of temperature on the dehydrogenating kinetics of  $\text{AlH}_3$  composite, the samples were powdered at different temperatures of 150, 170, 205 and 220 °C.

Differential thermal analysis measurements were performed using a TG-DSC METTLER TOLEDO instruments, the samples was handled and transferred to the instrument in T-zero pans and was heated from 40 to 260°C at different rate. In order to prevent sample exposure to air, the composite was sealed in an aluminum crucible.

**Figure S1. Proposed reagent of the  $\text{MgH}_2$  phase as identified by XRD**

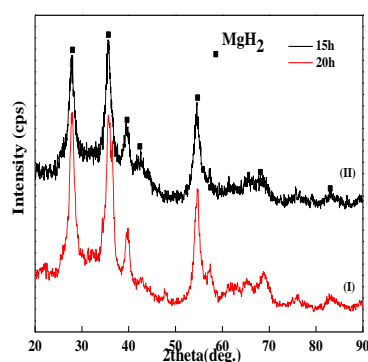

Fig.1 XRD patterns of Mg-5.5%Zn-0.6%Zr (mass.%) and Mg powders milled in hydrogen for 15 and 20h.

It is suggested from Fig. 1 that the solid-gas reaction was completed until milling in hydrogen for 15 and 20 h. Subsequently, the  $\text{MgH}_2$  phase was fully formed. Calculated by Scherrer equation based on the XRD patterns, the average crystallite size of  $\text{MgH}_2$  phase milling by Mg-5.5%Zn-0.6%Zr (mass.%) and Mg can reach 8.3 and 10 nm.

**Figure S2. Proposed reagent of the  $\text{MgH}_2$  phase as identified by SEM**

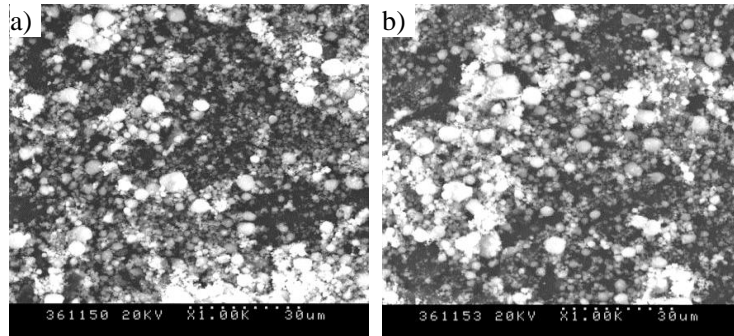

Fig. 2 SEM micrographs of Mg-5.5%Zn-0.6%Zr (mass.%) and Mg powders milled in hydrogen at various time: (a) 15 h, (b) 20 h.

Upon milling for 15 and 20h, the small portions of particles are coalesced to form aggregate or exist as larger particles. Moreover, it can be seen from the Fig. 2 that most individual particles were between 1 and 2  $\mu\text{m}$  in size.
